# Supplementary material for: Establishing an ANO1-Based Cell Model for High-Throughput Screening Targeting TRPV4 Regulators
Source: MDPI journal article supplement (doi:10.3390/molecules29051036), 2024-02-28
Supplement: s1 [file s1]

## Supplementary Material

### Establishing an ANO1-Based Cell Model for High-Throughput Screening Targeting TRPV4 Regulators

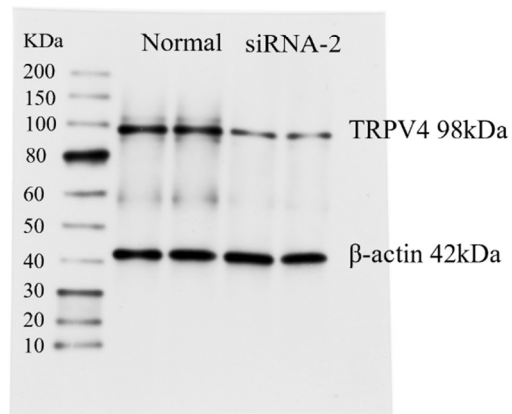

Supplementary Figure 1. Western blotting original image
